# Supplementary material for: Stromal Cell-Derived Factor 1 Protects Brain Vascular Endothelial Cells from Radiation-Induced Brain Damage
Source: MDPI journal article supplement (doi:10.3390/cells8101230), 2019-10-10
Supplement: s1 [file s1]

## Supplementary Data

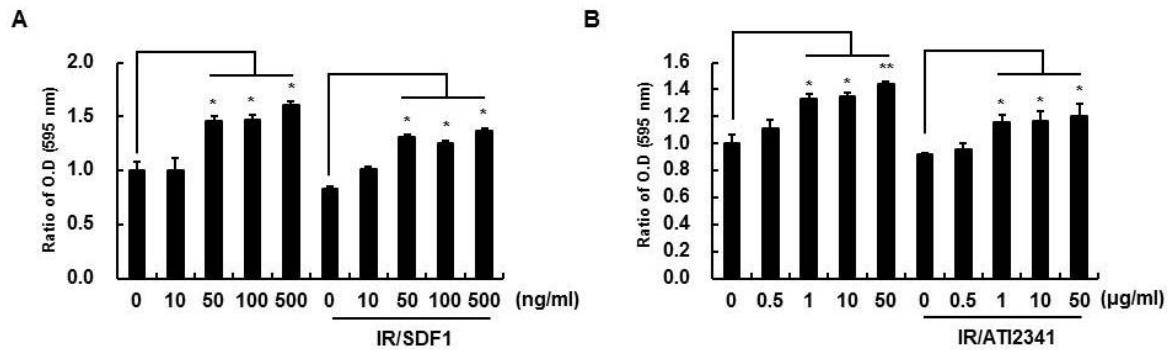

**Figure S1.** Cell proliferation effect of SDF1 and ATI2341 on HBMVECs. (A) SDF1 was treated at a concentration of 10 – 500 ng/ml. After reacting for 2 days, cell proliferation was measured using MTT assay. (B) ATI2341 was treated at a concentration of 0.5 – 50 µg/ml. After reacting for 2 days, cell proliferation was measured using MTT assay. The radiation was treated at a concentration of 4 Gy. Values are expressed as the mean  $\pm$  standard deviation of 3 independent experiments. \* $P < 0.05$  and \*\* $P < 0.01$ .

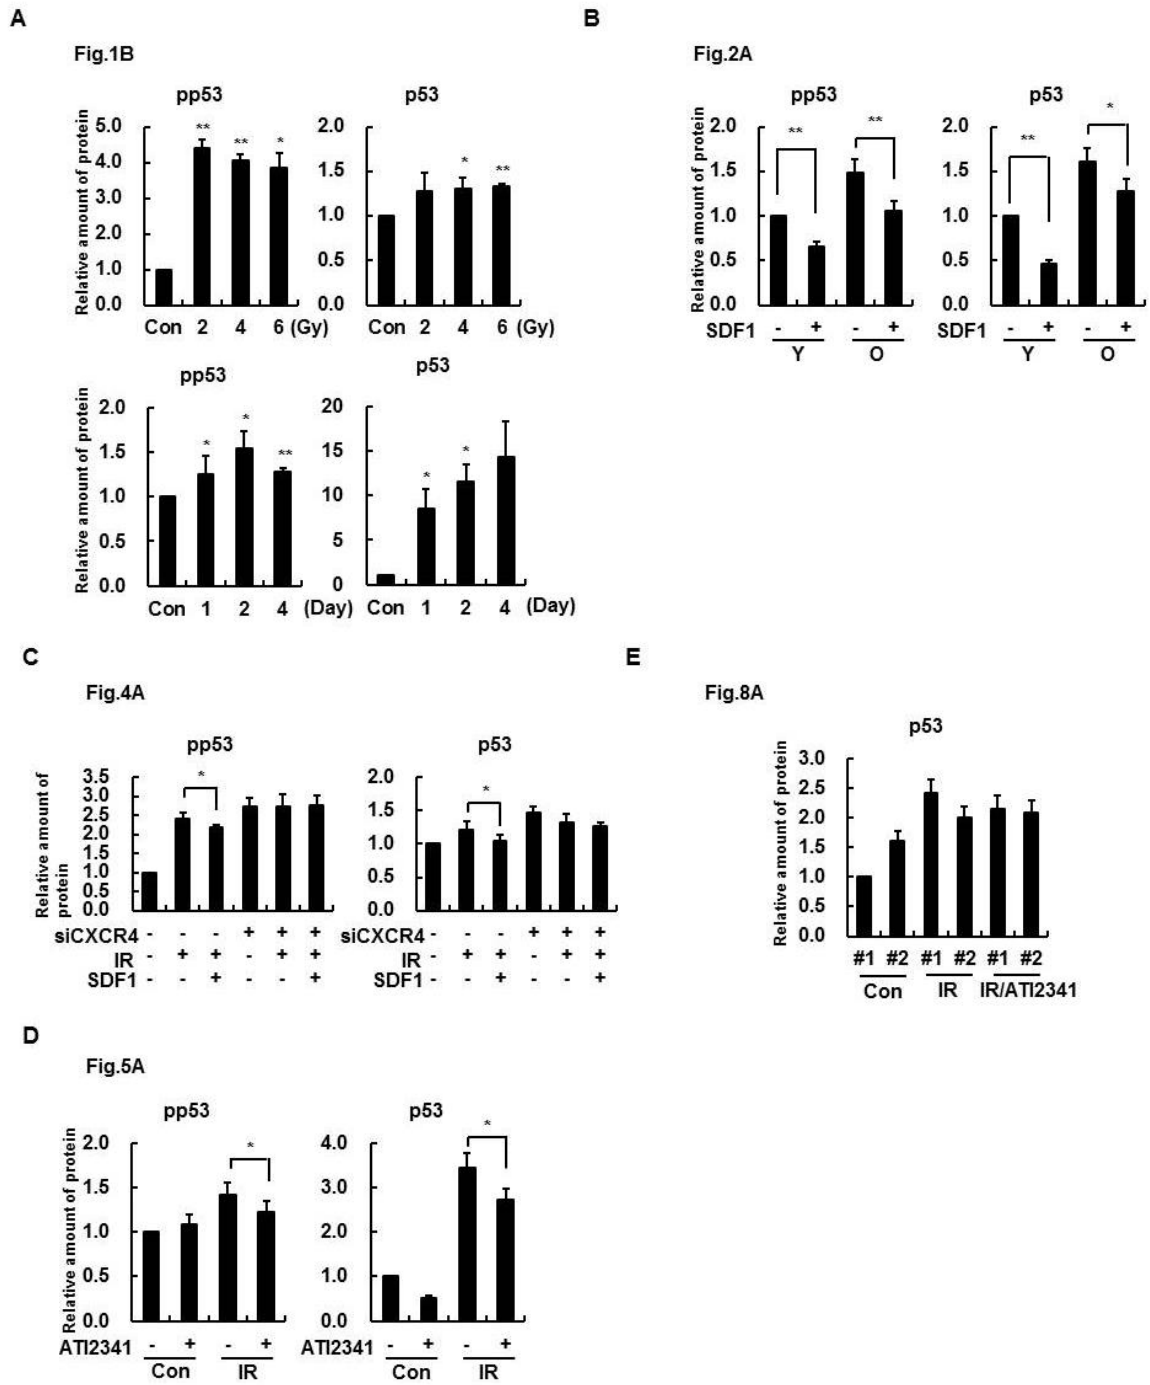

**Figure S2.** Graph of density measurement of bands in Western blots. Values are expressed as the mean  $\pm$  standard deviation of 3 independent experiments. \* $P < 0.05$  and \*\* $P < 0.01$ .
